# Supplementary material
Source: PubMed Central journal article supplement (PMC11064369)

DENV1

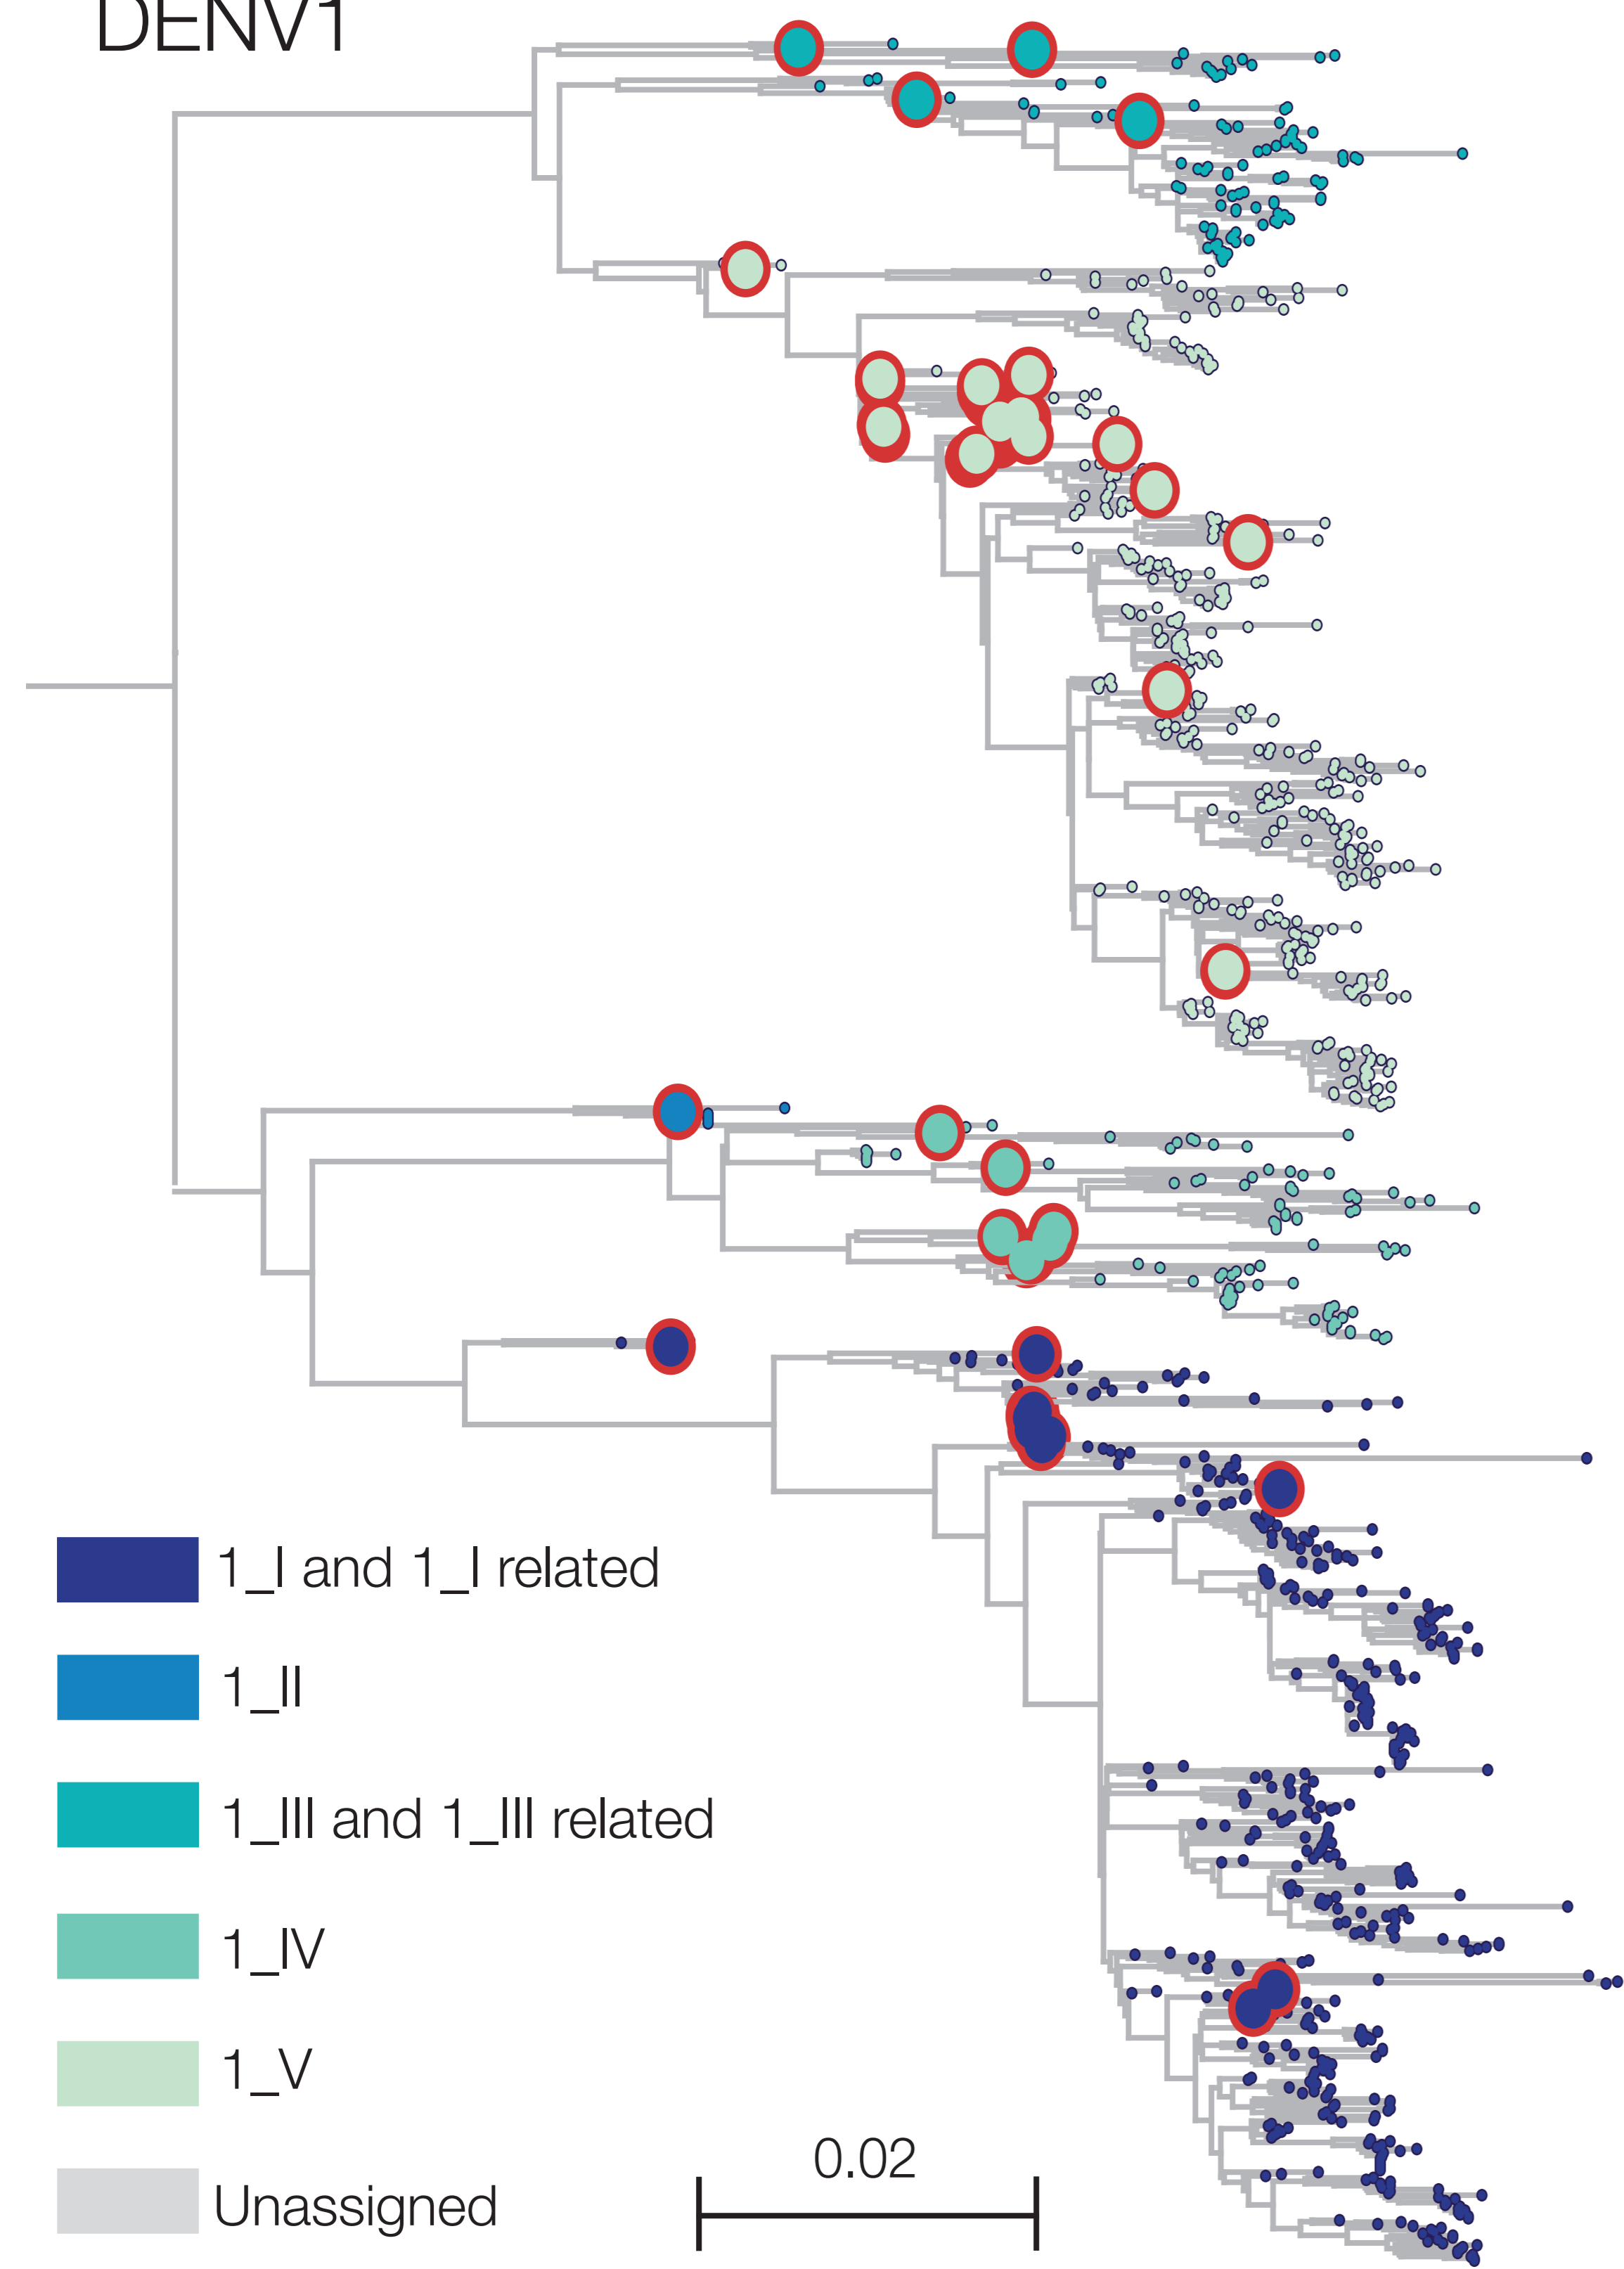

DENV2

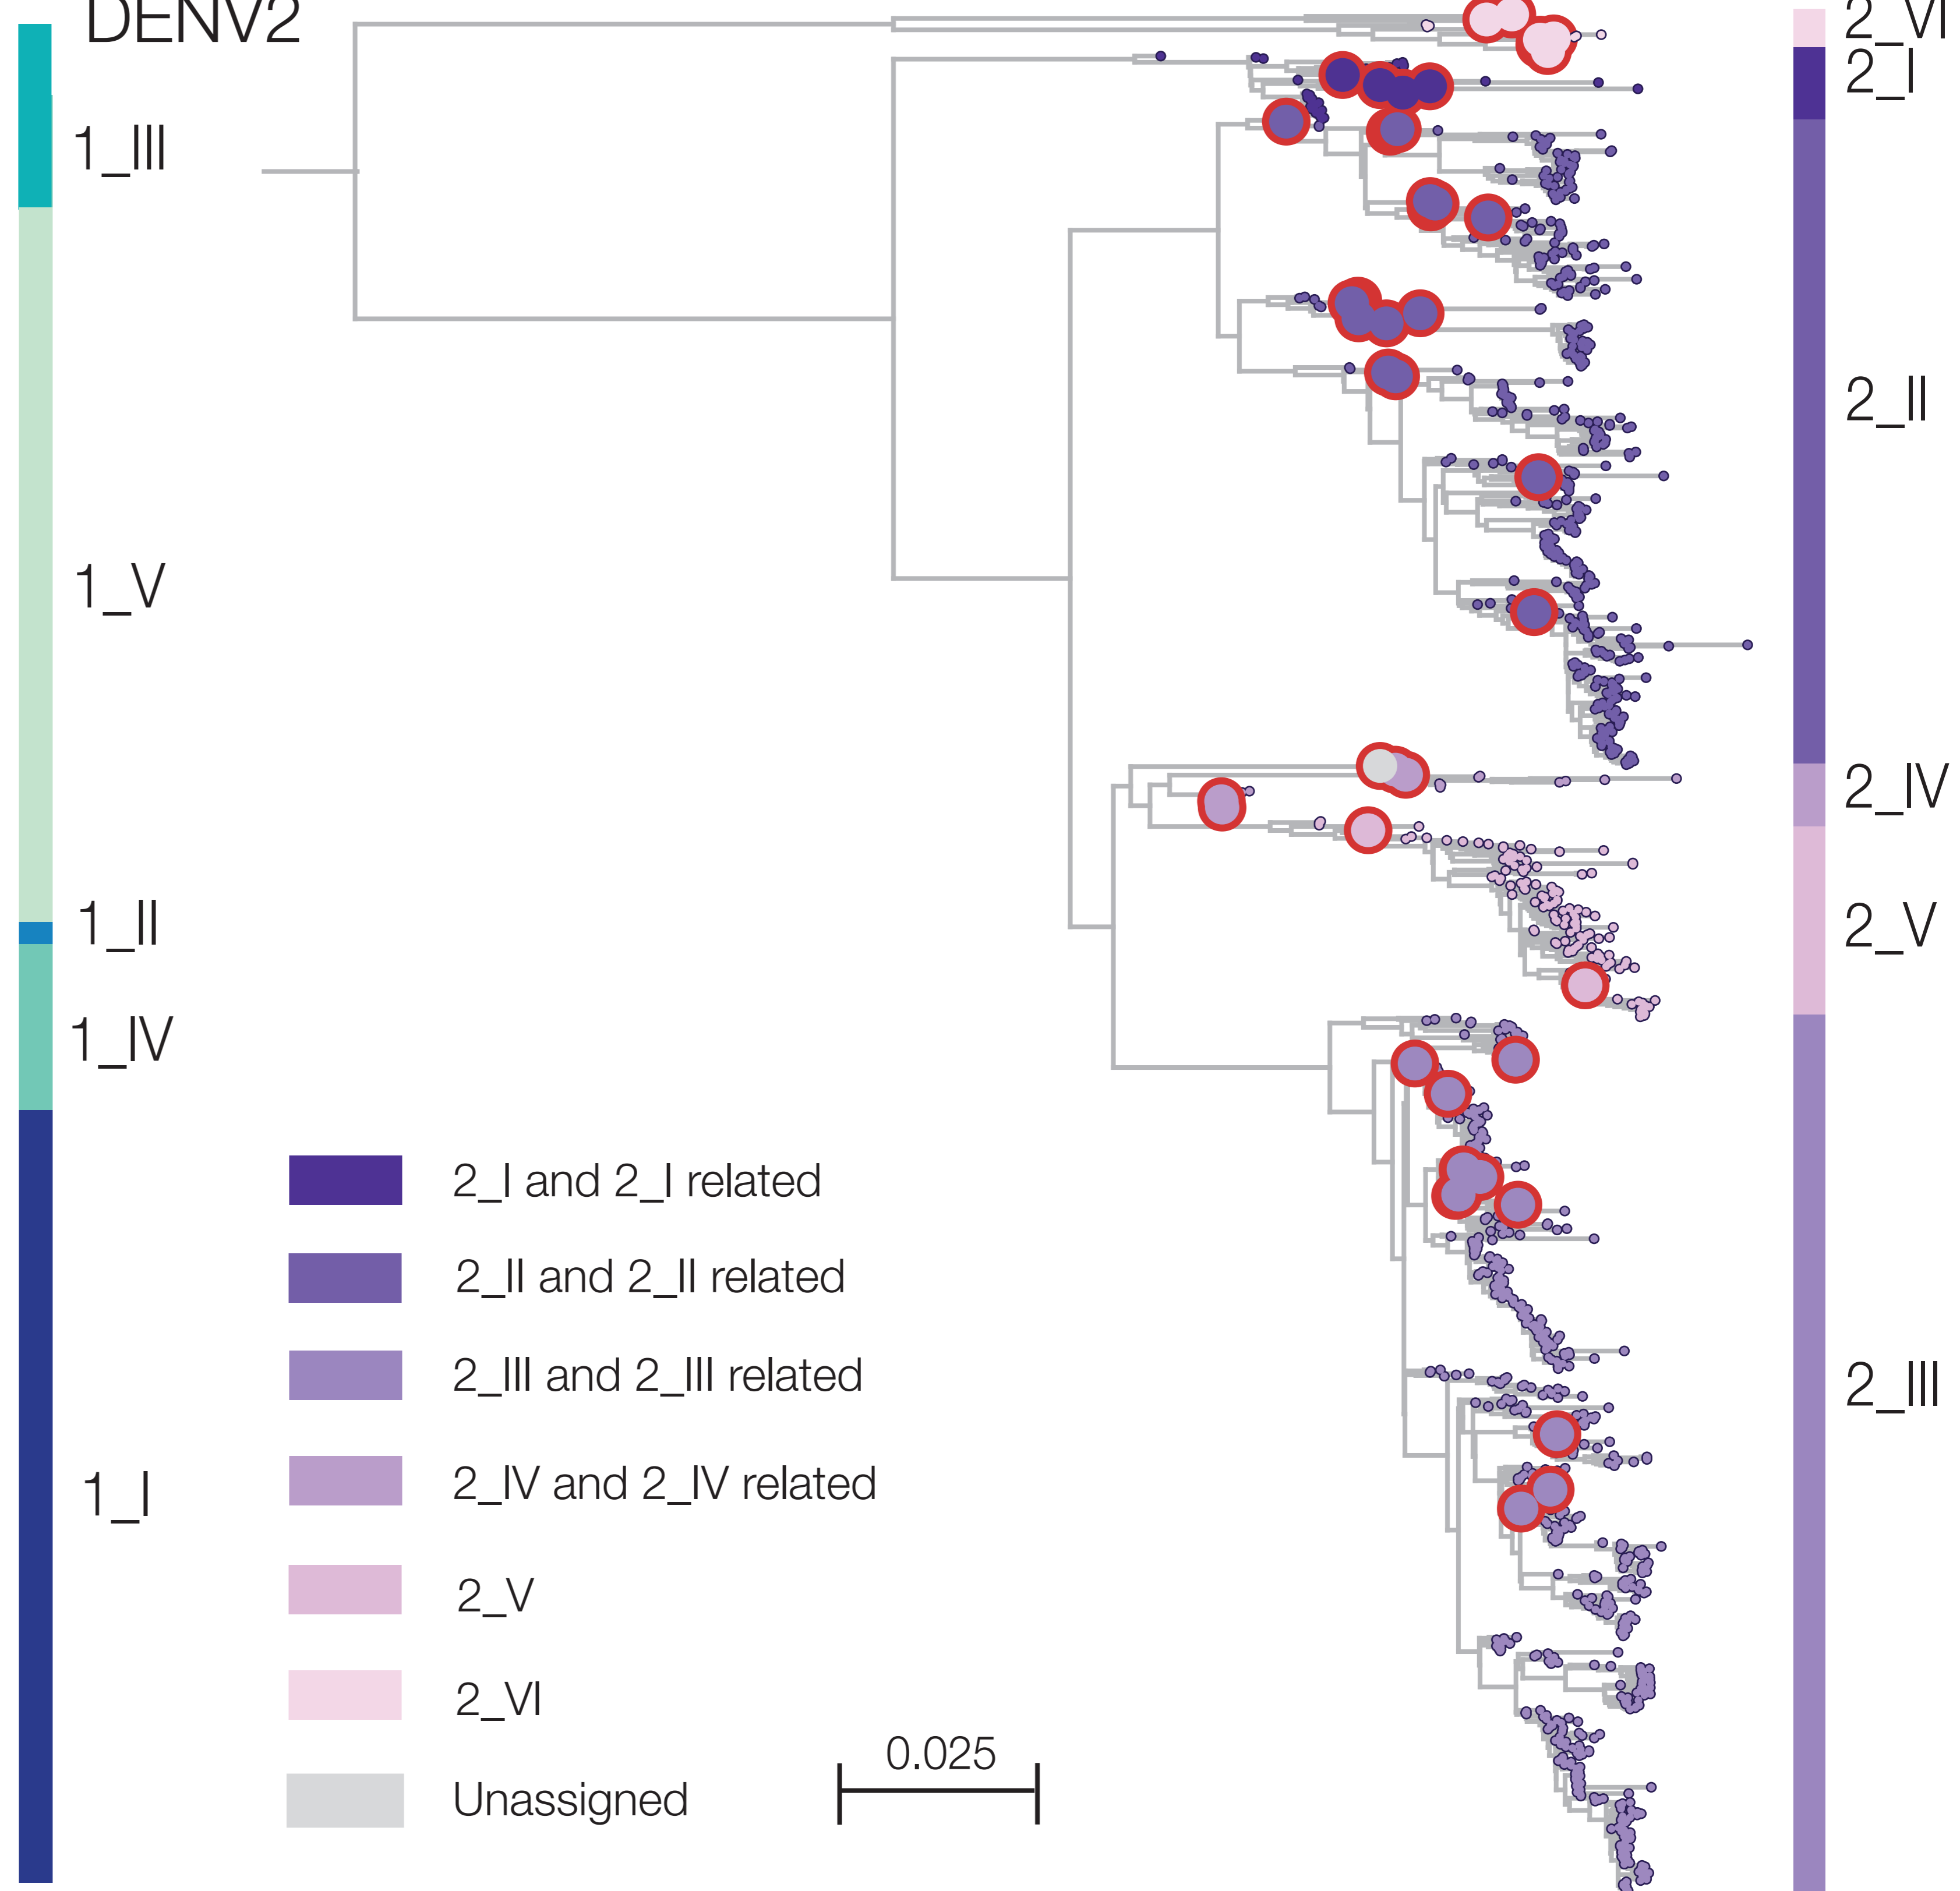

DENV3

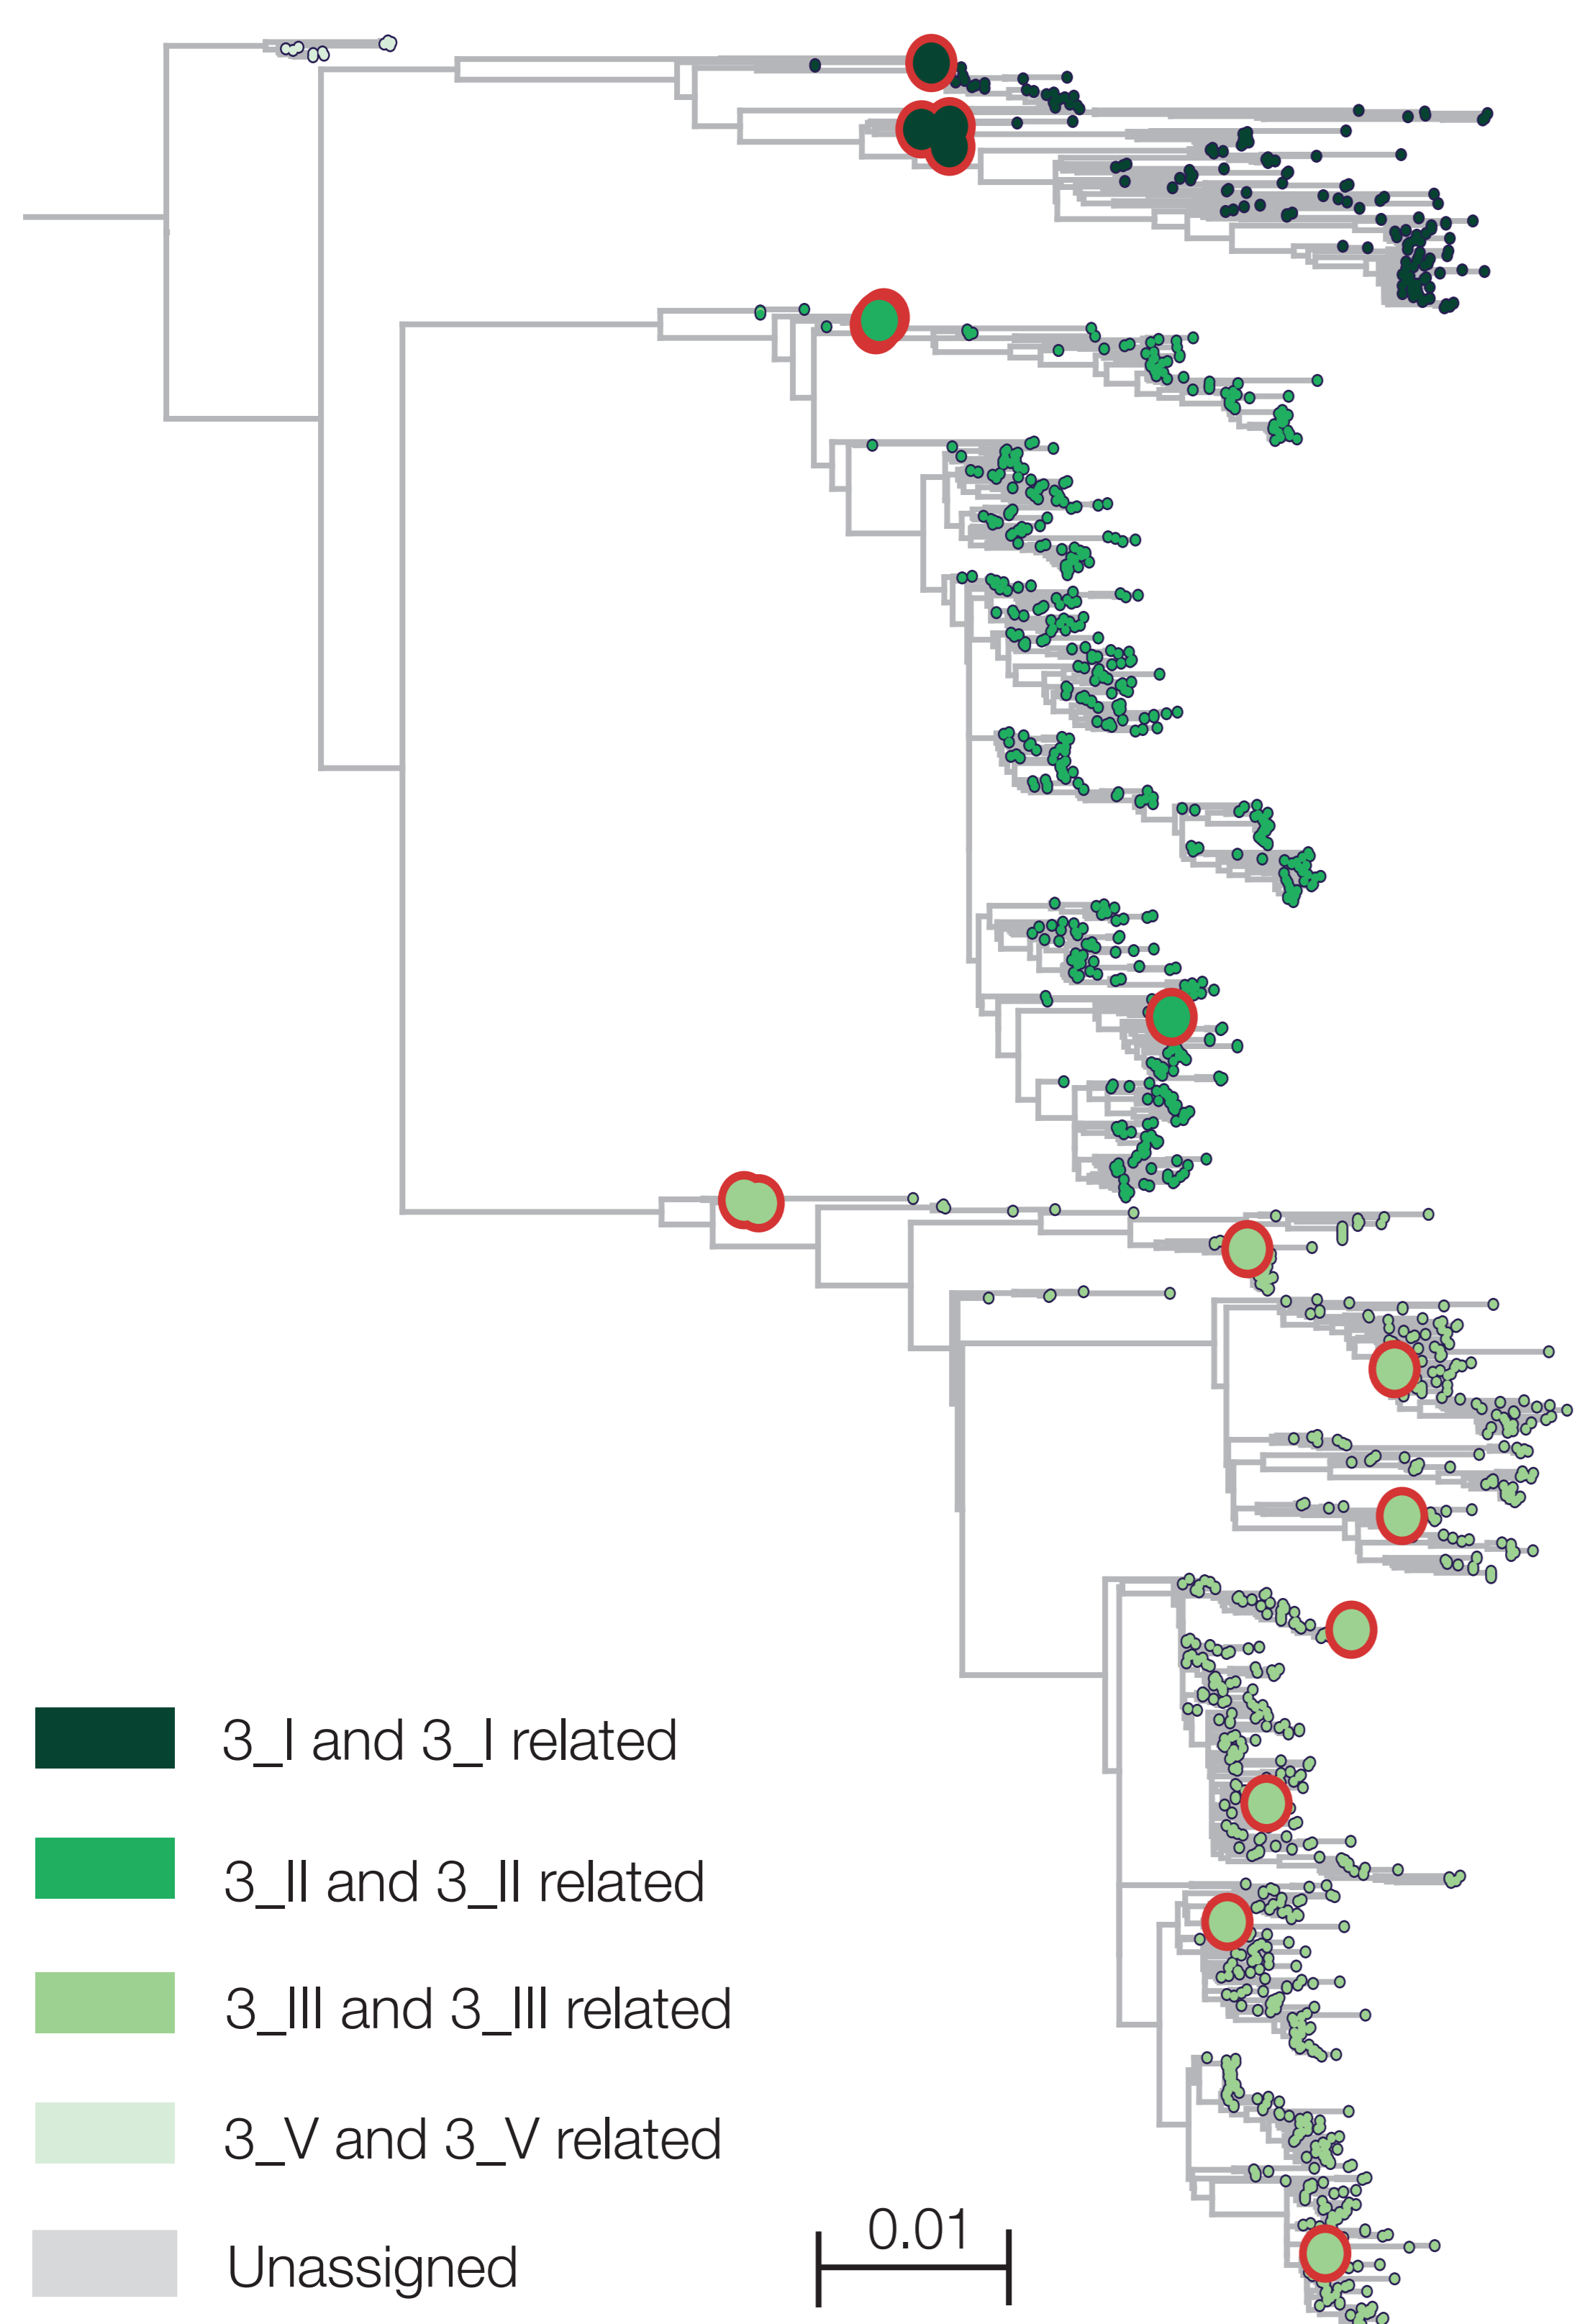

DENV4

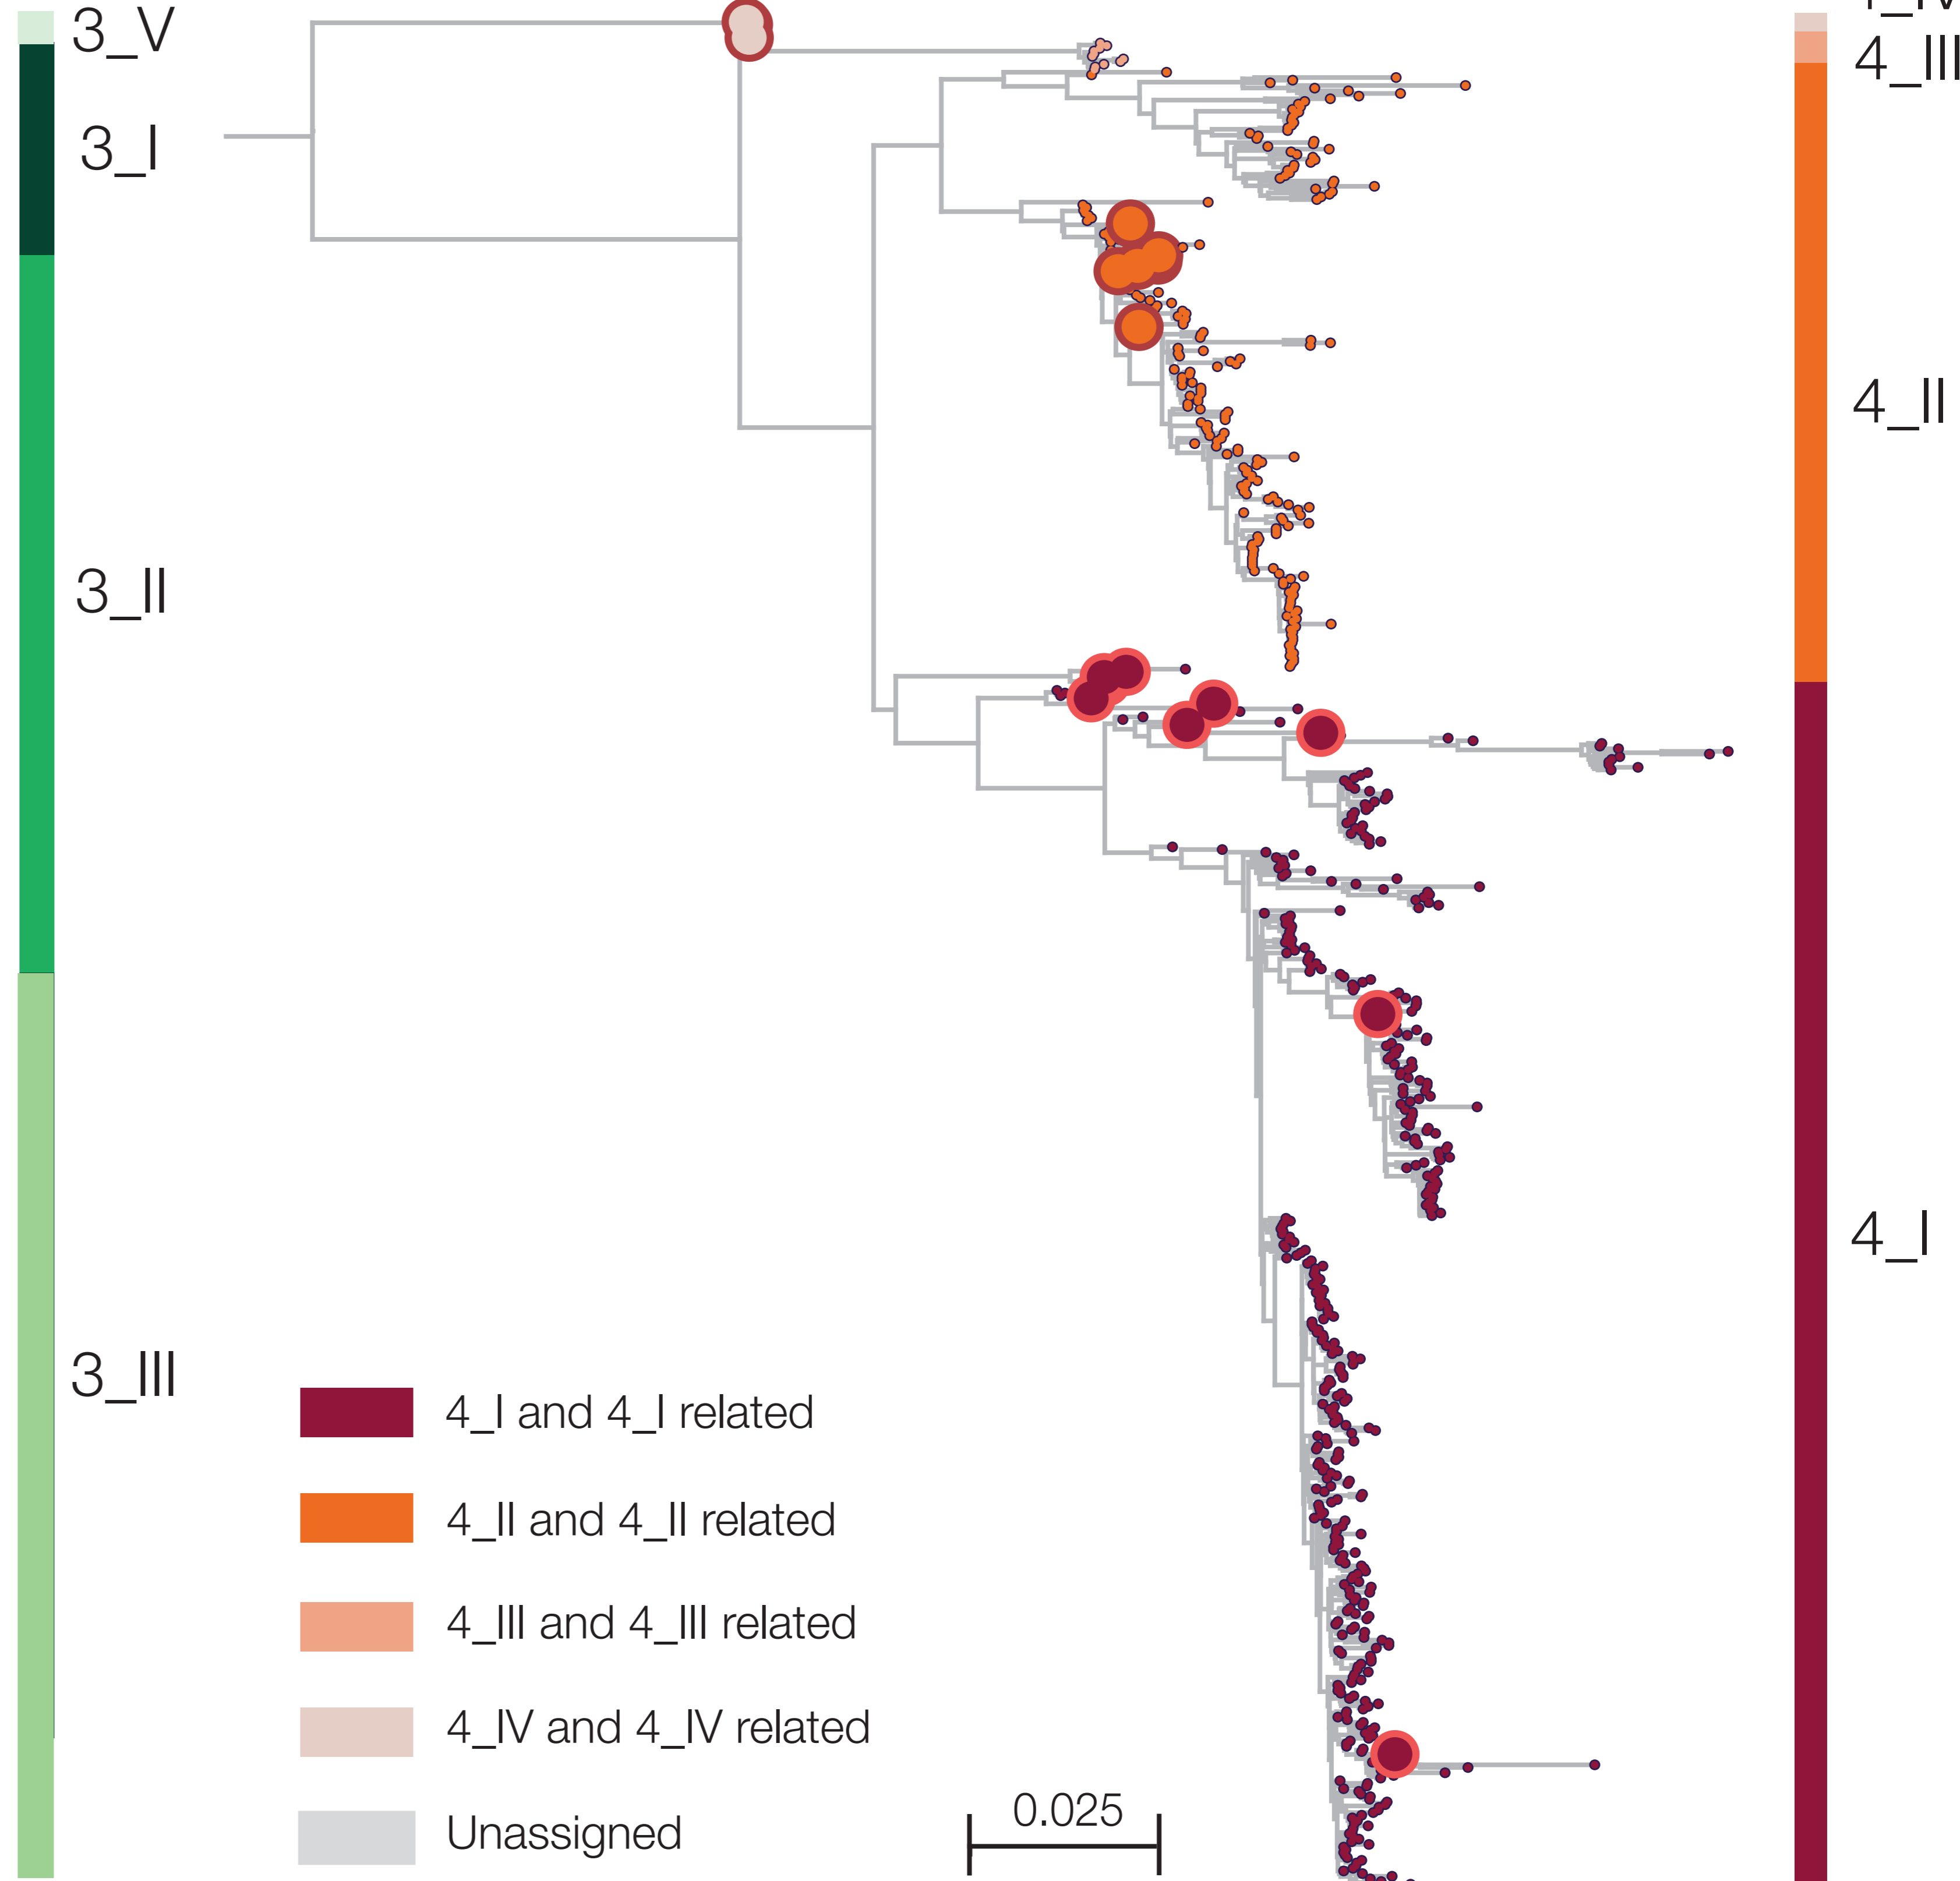

Supplement: 12864_2024_10350_MOESM4_ESM.pdf [file 12864_2024_10350_MOESM4_ESM.pdf]
